# Supplementary material for: A series of 3d–4f heterometallic coordination polymers constructed from size-tunable copper halide clusters and lanthanide-organic motifs
Source: Royal Society of Chemistry journal article supplement (doi:10.1039/c2ce25214g), 2012-01-01
Supplement: c2ce25214g.pdf [file c2ce25214g.pdf]

## Supporting Information

### **A series of 3d-4f heterometallic coordination polymers constructed from size-tunable copper halide clusters and lanthanide-organic motifs**

Guo Peng,<sup>a</sup> Zhihui Liu,<sup>a</sup> Li Ma,<sup>a</sup> Li Liang,<sup>a</sup> Limin Zhang,<sup>a</sup> Hong Deng,<sup>\*a</sup> George E Kostakis,<sup>\*b</sup>

*a School of Chemistry & Environment and Key Laboratory of Electrochemical Technology on Energy Storage and Power Generation in Guangdong Universities, South China Normal University, Guangzhou 510006, P. R. China*

*b Institute of Nanotechnology, Karlsruhe Institute of Technology, Hermann-von-Helmholtz Platz 1, 76344 Eggenstein-Leopoldshafen, Germany*

*\*To whom Correspondence should be addressed. E-mail: dh@scnu.edu.cn,*

*George.Kostakis@kit.edu*

**Table S1.** Selected bond lengths (Å) for compounds **1**, **4** and **8-10**

| <b>Compound 1</b>                                                                                                  |           |               |           |               |           |
|--------------------------------------------------------------------------------------------------------------------|-----------|---------------|-----------|---------------|-----------|
| Sm(1)-O(6)                                                                                                         | 2.339(6)  | Sm(1)-O(8)#1  | 2.339(7)  | Sm(1)-O(12)#2 | 2.365(6)  |
| Sm(1)-O(2)#3                                                                                                       | 2.382(6)  | Sm(1)-O(3)#4  | 2.420(7)  | Sm(1)-O(10)#4 | 2.482(7)  |
| Sm(1)-O(1W)                                                                                                        | 2.507(8)  | Sm(1)-O(9)#4  | 2.630(7)  | Sm(2)-O(5)    | 2.339(6)  |
| Sm(2)-O(11)#2                                                                                                      | 2.348(6)  | Sm(2)-O(4)#2  | 2.370(6)  | Sm(2)-O(7)#5  | 2.391(7)  |
| Sm(2)-O(1)                                                                                                         | 2.403(6)  | Sm(2)-O(3W)   | 2.493(7)  | Sm(2)-O(2W)   | 2.535(7)  |
| Sm(2)-O(4W)                                                                                                        | 2.546(8)  | Cu(1)-Br(1)   | 2.360(2)  | Cu(2)-Br(1)   | 2.403(2)  |
| Cu(1)-Br(2)                                                                                                        | 2.360(2)  | Cu(2)-Br(2)#6 | 2.499(2)  | Cu(2)-Br(2)   | 2.888(2)  |
| Cu(4)-Br(3)                                                                                                        | 2.383(2)  | Cu(3)-Br(3)   | 2.543(2)  | Cu(6)-Br(3)   | 2.573(2)  |
| Cu(6)-Br(4)                                                                                                        | 2.428(2)  | Cu(3)-Br(4)   | 2.439(2)  | Cu(4)-Br(5)   | 2.398(2)  |
| Cu(5)-Br(5)                                                                                                        | 2.418(2)  | Cu(5)-Br(6)   | 2.412(2)  | Cu(6)-Br(6)   | 2.620(3)  |
| Symmetry codes: #1 -x+2, -y+1, -z+1 #2 x-1, y+1, z #3 x+1, y, z #4 x, y+1, z #5 -x+1, -y+1, -z+1 #6 -x+1, -y+1, -z |           |               |           |               |           |
| <b>Compound 4</b>                                                                                                  |           |               |           |               |           |
| Cu(2)-Br(1)                                                                                                        | 2.451(2)  | Cu(1)-Br(1)#1 | 2.552(3)  | Cu(1)-Br(1)#2 | 2.626(3)  |
| Cu(2)-Br(2)                                                                                                        | 2.383(3)  | Cu(1)-Br(2)#1 | 2.418(3)  | Gd(1)-O(1)    | 2.307(7)  |
| Gd(1)-O(3)                                                                                                         | 2.340(6)  | Gd(1)-O(5)    | 2.490(6)  | Gd(1)-O(6)#3  | 2.498(6)  |
| Gd(2)-O(4)                                                                                                         | 2.335(7)  | Gd(2)-O(2)#4  | 2.371(7)  | Gd(2)-O(3W)   | 2.463(7)  |
| Gd(2)-O(4W)                                                                                                        | 2.485(7)  |               |           |               |           |
| Symmetry codes: #1 -x-1/2, y+1/2, z #2 x+1/2, y+1/2, -z+1/2 #3 -x, -y, -z+1 #4 -x, y, -z+1/2                       |           |               |           |               |           |
| <b>Compound 8</b>                                                                                                  |           |               |           |               |           |
| Cu(3)-Br(1)#1                                                                                                      | 2.312(3)  | Cu(2)-Br(1)   | 2.405(3)  | Cu(1)-Br(1)   | 2.653(4)  |
| Cu(3)-Br(2)                                                                                                        | 2.506(3)  | Cu(1)-Br(2)   | 2.583(3)  | Cu(2)-Br(3)#1 | 2.337(3)  |
| Cu(1)-Br(3)                                                                                                        | 2.400(3)  | Tb(1)-O(1)    | 2.317(10) | Tb(1)-O(2)#2  | 2.288(10) |
| Tb(1)-O(3)                                                                                                         | 2.385(11) | Tb(1)-O(4)#3  | 2.348(10) | Tb(1)-O(4)    | 2.473(10) |
| Tb(1)-O(5)                                                                                                         | 2.280(10) | Tb(1)-O(6)#3  | 2.312(10) | Tb(1)-O(1W)   | 2.381(11) |
| Symmetry codes: #1 -x+1, -y+2, -z+1 #2 x, -y+3/2, z+1/2 #3 -x+2, -y+2, -z                                          |           |               |           |               |           |
| <b>Compound 9</b>                                                                                                  |           |               |           |               |           |
| Cu(1)-Br(1)                                                                                                        | 2.431(2)  | Cu(1)-Br(2)   | 2.576(2)  | Cu(1)-Br(3)   | 2.669(2)  |
| Cu(2)-Br(2)                                                                                                        | 2.399(2)  | Cu(2)-Br(1)   | 2.401(2)  | Cu(3)-Br(6)   | 2.323(7)  |
| Cu(3)-Br(4)                                                                                                        | 2.451(4)  | Cu(3)-Br(2)#1 | 2.537(3)  | Cu(3)-Br(3)   | 2.785(3)  |
| Cu(4)-Br(4)#1                                                                                                      | 2.176(8)  | Cu(4)-Br(1)#1 | 2.537(7)  | Er(1)-O(2)#2  | 2.227(8)  |
| Er(1)-O(3)                                                                                                         | 2.269(7)  | Er(1)-O(1W)   | 2.423(9)  | Er(1)-O(2W)   | 2.479(7)  |
| Er(2)-O(1)#3                                                                                                       | 2.248(7)  | Er(2)-O(4)    | 2.266(6)  | Er(2)-O(6)    | 2.431(7)  |
| Er(2)-O(5)                                                                                                         | 2.446(7)  |               |           |               |           |
| Symmetry codes: #1 -x+1/2, y, -z+3/2 #2 x+1/2, -y+1, z-1/2 #3 -x+1, -y+2, -z+2                                     |           |               |           |               |           |
| <b>Compound 10</b>                                                                                                 |           |               |           |               |           |
| Cu(2)-Cl(1)                                                                                                        | 2.327(3)  | Cu(1)-Cl(1)   | 2.488(2)  | Cu(3)-Cl(2)#1 | 2.215(2)  |
| Cu(2)-Cl(2)                                                                                                        | 2.234(3)  | Cu(2)-Cl(3)   | 2.247(3)  | Cu(3)-Cl(3)#2 | 2.482(3)  |
| Gd(1)-O(3)#3                                                                                                       | 2.323(5)  | Gd(1)-O(2)#1  | 2.326(5)  | Gd(1)-O(6)#4  | 2.379(5)  |
| Gd(1)-O(5)                                                                                                         | 2.381(5)  | Gd(1)-O(4)#5  | 2.383(5)  | Gd(1)-O(1)    | 2.387(5)  |
| Gd(1)-O(2W)                                                                                                        | 2.476(5)  | Gd(1)-O(1W)   | 2.551(5)  |               |           |
| Symmetry codes: #1 -x+1, -y+1, -z+1 #2 x, -y+1/2, z-1/2 #3 x, y+1, z #4 -x, -y+1, -z+1 #5 -x, -y, -z+1             |           |               |           |               |           |

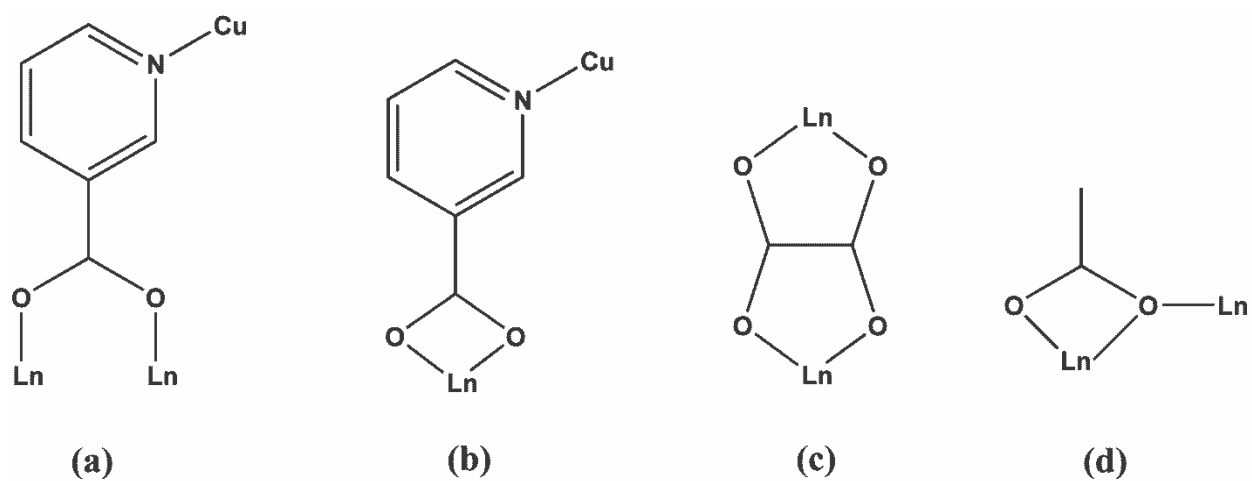

**Scheme S1** Coordination modes of nicotinate, oxalate, acetate ligands in compounds **1-10**.

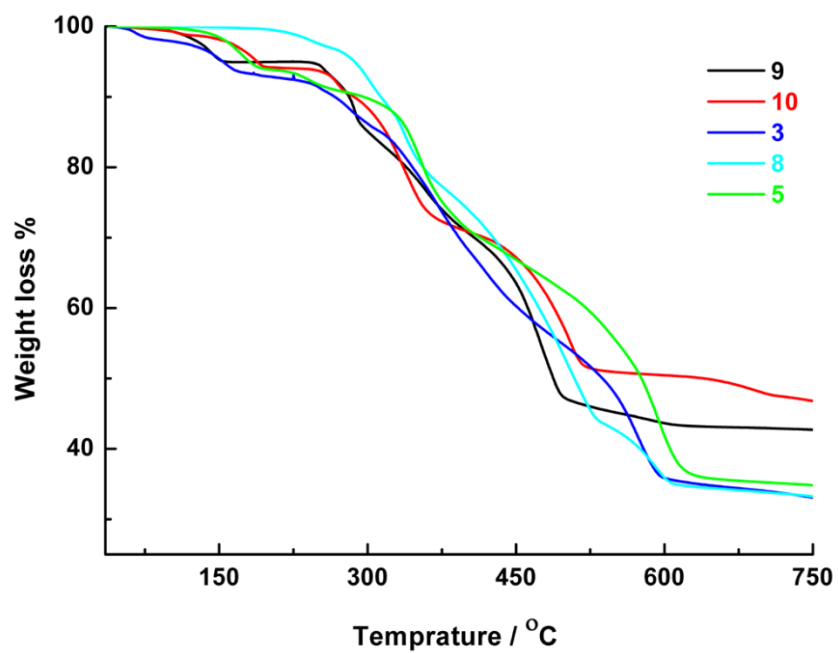

**Fig. S1.** The TGA curves of compounds **3, 5, 8, 9** and **10**

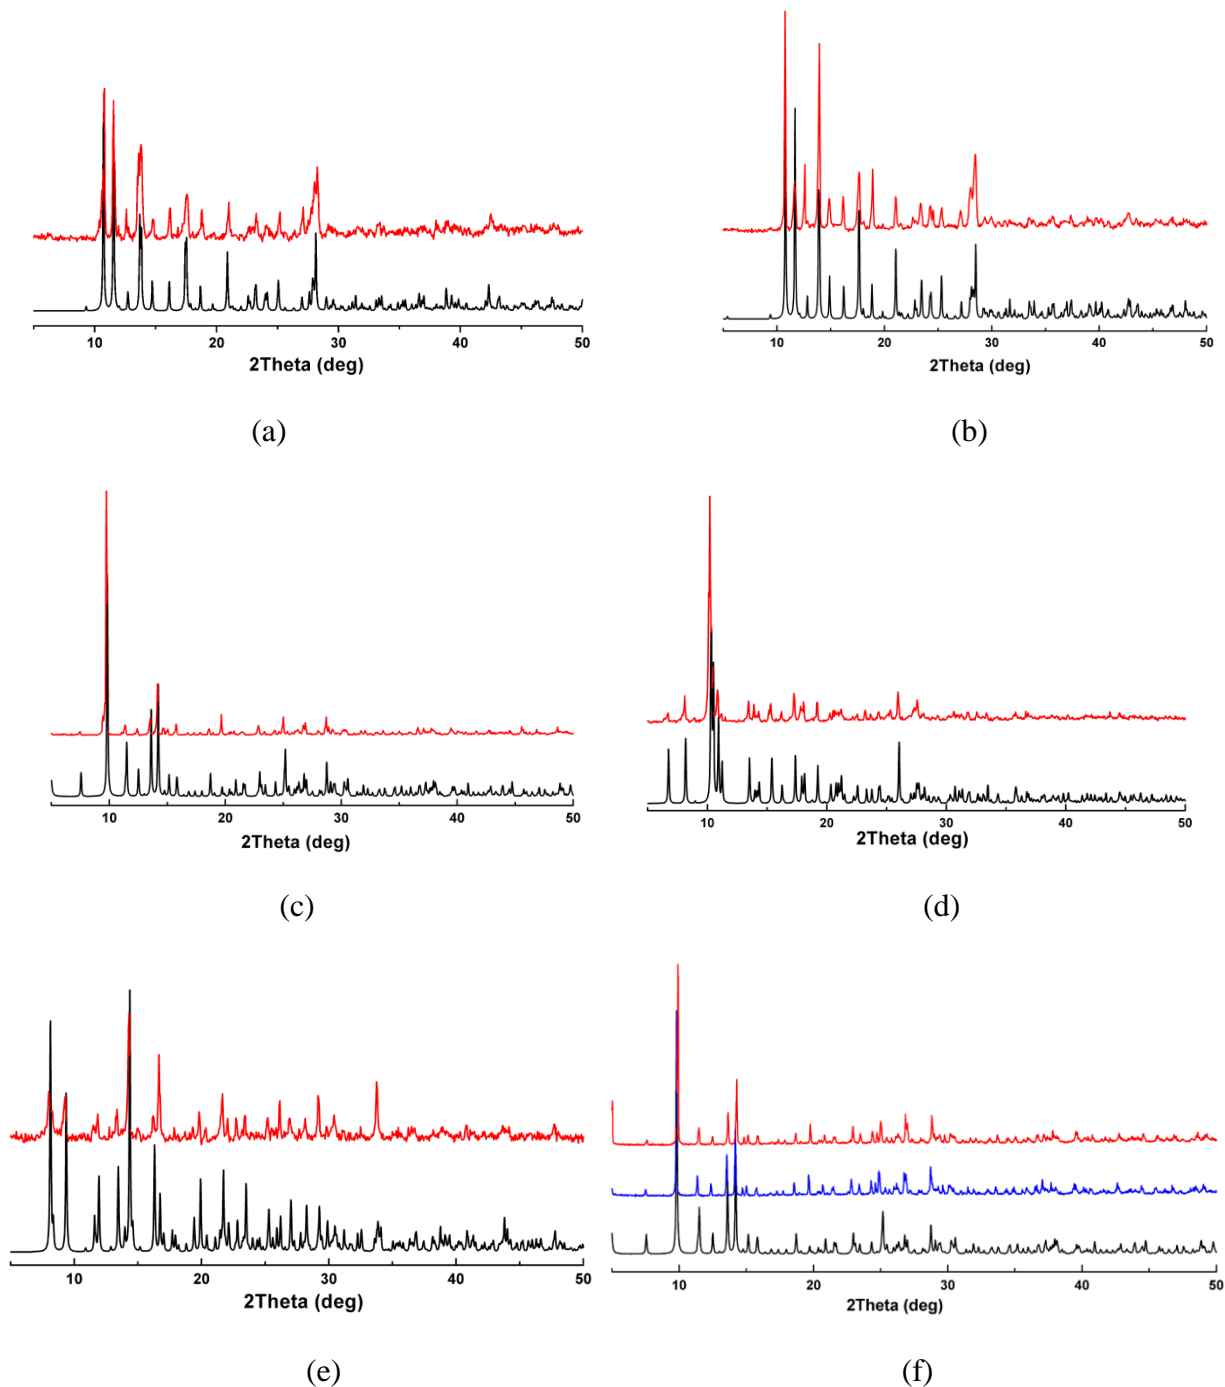

**Fig. S2** PXRD patterns for: (a) compound **4**, as simulated (black) and as synthesized (red); (b) compound **5**, as simulated (black) and as synthesized (red); (c) compound **8**, as simulated (black) and as synthesized (red); (d) compound **9**, as simulated (black) and as synthesized (red); (e) and as synthesized (red); (f) compound **9**, as simulated (black), synthesized (red), and as synthesized (blue).

compound **10**, as simulated (black) and as synthesized (red); (f) compounds **6-7**, as simulated for **8** (black) and as synthesized for **6** (blue) and **7** (red).

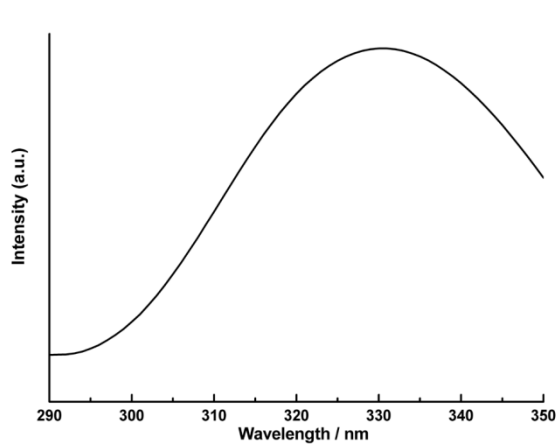

(a)

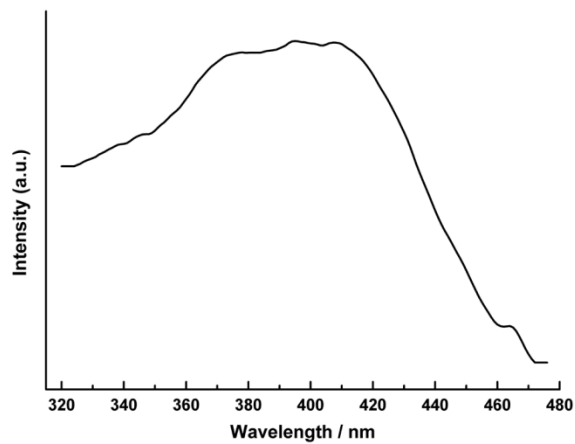

(b)

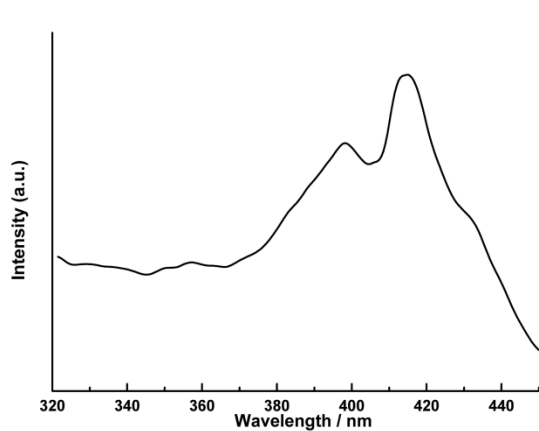

(c)

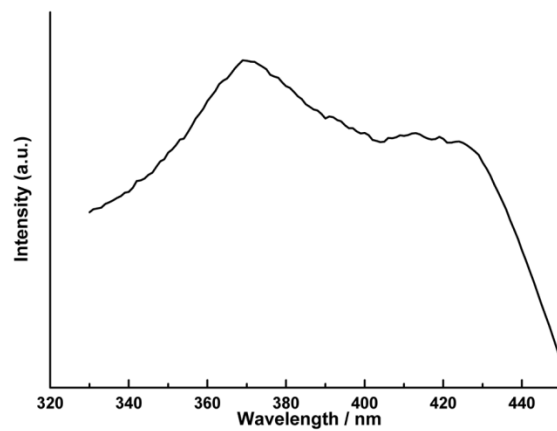

(d)

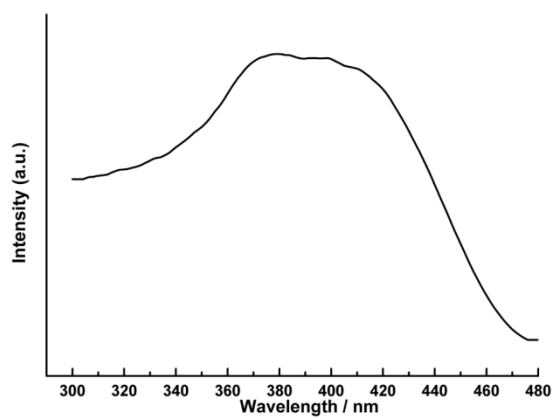

(e)

**Fig. S3** The excitation spectra for (a) HNA ligand, (b) compound 1, (c) compound 3, (d) compound 6, (e) compound 8.

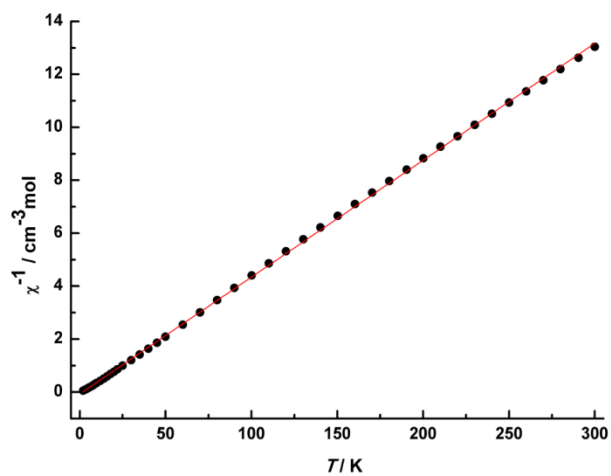

(a)

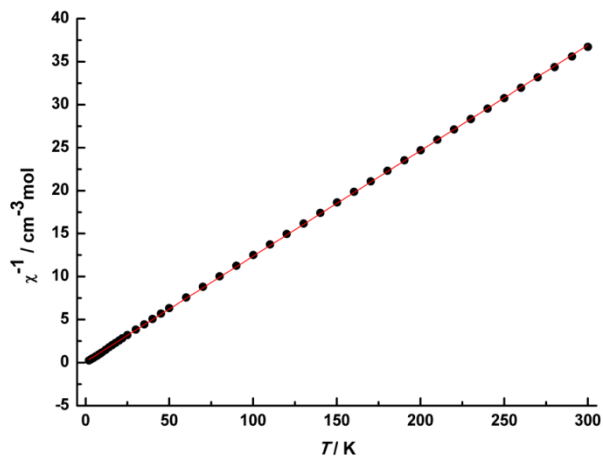

(b)

**Fig. S4** The temperature dependence of  $\chi^{-1}$  curves for compound **9** (a) and **10** (b).

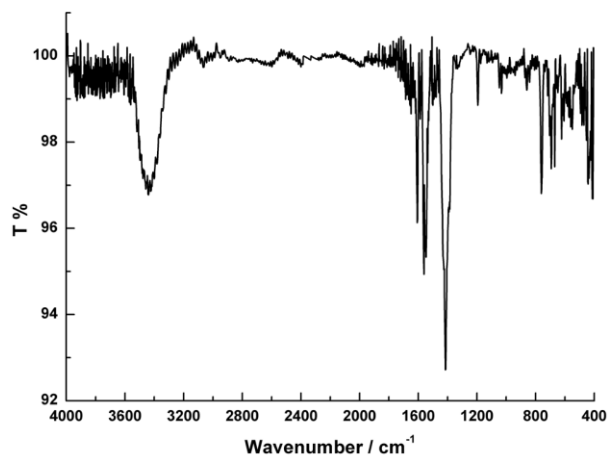

(1)

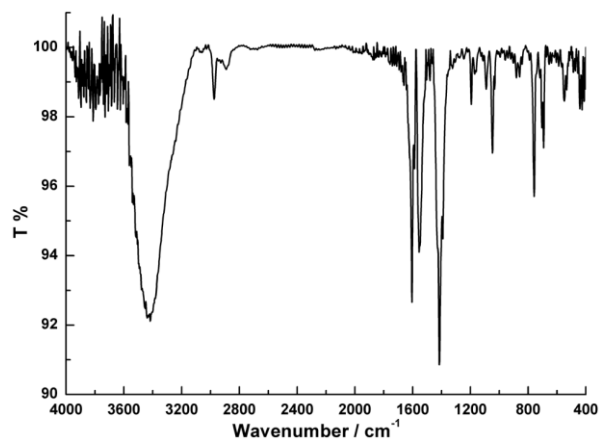

(2)

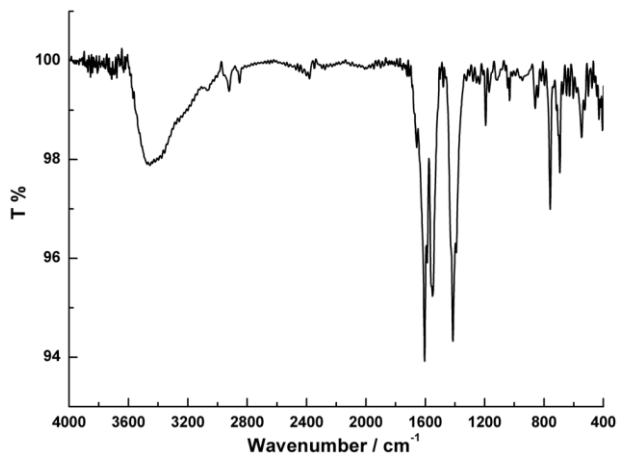

(3)

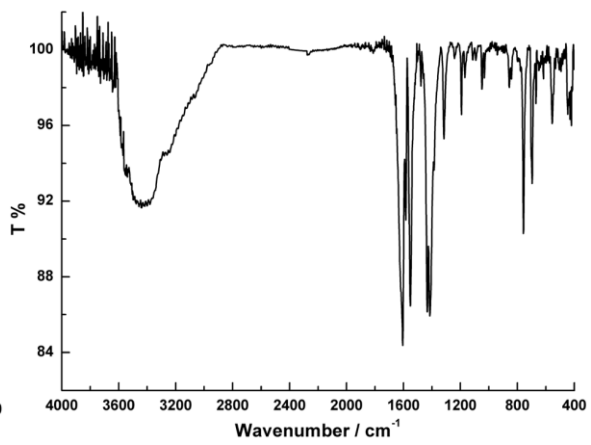

(4)



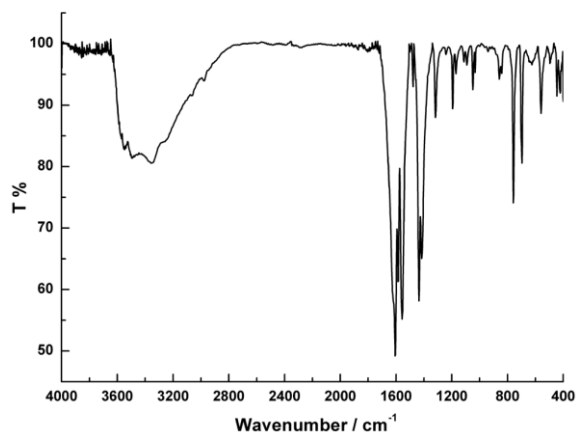

(5)

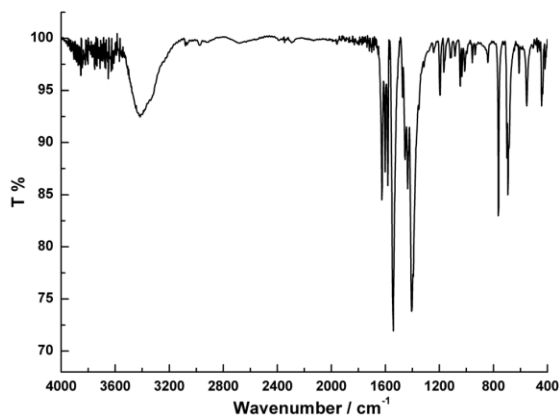

(6)

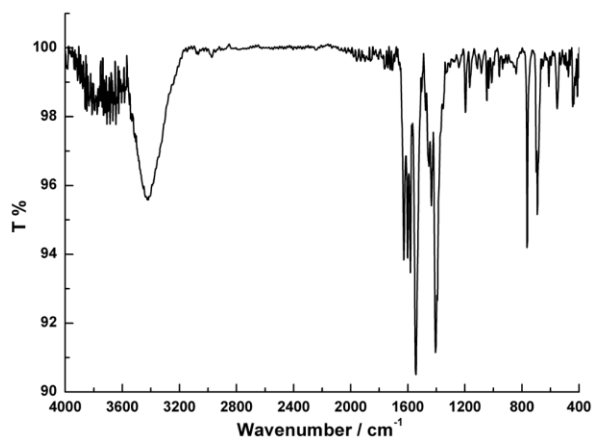

(7)

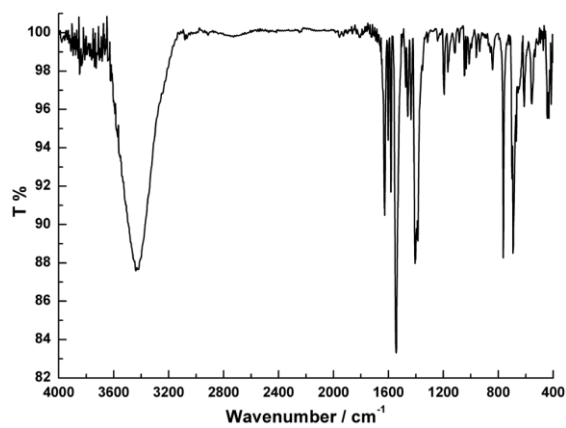

(8)

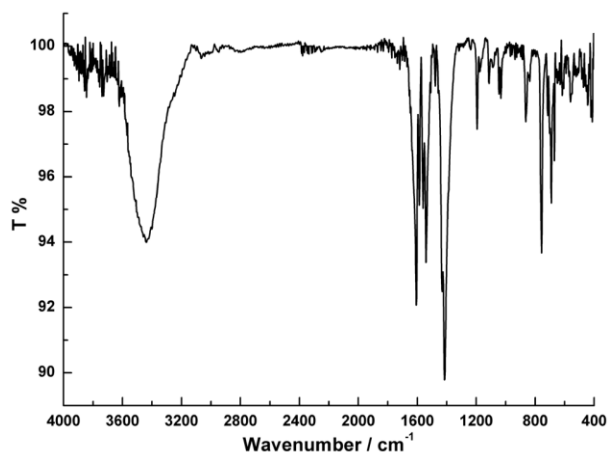

(9)

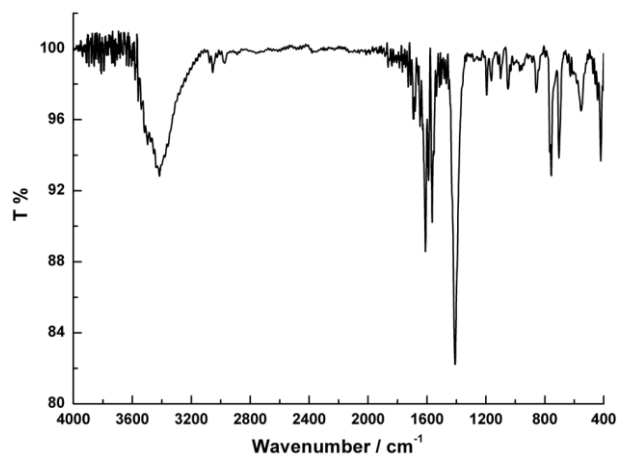

(10)

**Fig. S5** IR plots of compounds 1-10.
